1                   **Crystal structure of the 2019-nCoV spike receptor-binding**  
2                   **domain bound with the ACE2 receptor**

3  
4           Jun Lan<sup>1,\*</sup>, Jiwan Ge<sup>1,\*</sup>, Jinfang Yu<sup>1,\*</sup>, Sisi Shan<sup>2,\*</sup>, Huan Zhou<sup>3</sup>, Shilong Fan<sup>1</sup>, Qi Zhang<sup>2</sup>,  
5           Xuanling Shi<sup>2</sup>, Qisheng Wang<sup>3</sup>, Linqi Zhang<sup>2,#</sup>, Xinquan Wang<sup>1,#</sup>

6  
7  
8           <sup>1</sup>The Ministry of Education Key Laboratory of Protein Science, Beijing Advanced Innovation Center for  
9           Structural Biology, Beijing Frontier Research Center for Biological Structure, Collaborative Innovation  
10          Center for Biotherapy, School of Life Sciences, Tsinghua University, 100084 Beijing, China

11          <sup>2</sup>Comprehensive AIDS Research Center, and Beijing Advanced Innovation Center for Structural Biology,  
12          School of Medicine, Tsinghua University, Beijing 100084, China

13          <sup>3</sup>Shanghai Synchrotron Radiation Facility, Shanghai Advanced Research Institute, Chinese Academy of  
14          Sciences, Shanghai 201204, China

15  
16          \*These authors contributed equally to this work

17          #Correspondence: [zhanglinqi@mail.tsinghua.edu.cn](mailto:zhanglinqi@mail.tsinghua.edu.cn), (L.Z.), [xinquanwang@mail.tsinghua.edu.cn](mailto:xinquanwang@mail.tsinghua.edu.cn) (X.W.)

18

19 **Abstract**

20 A novel and highly pathogenic coronavirus (2019-nCoV) has caused an outbreak in Wuhan  
21 city, Hubei province of China since December 2019, and soon spread nationwide and spilled  
22 over to other countries around the world. To better understand the initial step of infection at  
23 atomic-level, we determined the crystal structure of the 2019-nCoV spike receptor-binding  
24 domain (RBD) bound with the cell receptor ACE2 at 2.45 Å resolution. The overall ACE2-  
25 binding mode of the 2019-nCoV RBD is nearly identical to that of the SARS-CoV RBD, which  
26 also utilizes ACE2 as the cell receptor. Structural analysis identified residues in 2019-nCoV  
27 RBD critical for ACE2 binding, and majority of which are either highly conserved or shared  
28 similar side chain properties with those in the SARS-CoV RBD. Such similarity in structure  
29 and sequence strongly argue for a convergent evolution between 2019-nCoV and SARS-CoV  
30 RBD for improved binding to ACE2 despite of being segregated in different genetic lineages  
31 in the betacoronavirus genus. The epitopes of two SARS-CoV antibodies targeting the RBD  
32 are also analyzed with the 2019-nCoV RBD, providing insights into future identification of  
33 cross-reactive antibodies.

34 The emergence of a novel and highly pathogenic coronavirus (2019-nCoV) in Wuhan city,  
35 Hubei province of China and its rapid international spread has posed a serious global public  
36 health emergency<sup>1-3</sup>. Similar to those infected by pathogenic severe acute respiratory syndrome  
37 coronavirus (SARS-CoV) in 2003 and Middle East respiratory syndrome coronavirus (MERS-  
38 CoV) in 2012, patients infected by 2019-nCoV manifested a range of symptoms including dry  
39 cough, fever, headache, dyspnea and pneumonia with estimated mortality rate of 2.5%<sup>4-6</sup>. Since  
40 the initial outbreak in December of 2019, 2019-nCoV has spread throughout China and to more  
41 than twenty other countries worldwide. As of February 17, 2020, 70641 cases in China have  
42 been confirmed with the infection while 7264 cases are suspected, and 1772 cases have died.  
43 Currently, the epicenter Wuhan and the neighboring cities have been under lockdown to  
44 minimize continued spread, and the WHO has announced a Public Health Emergency of  
45 International Concern (PHEIC) due to the rapid and global dissemination of 2019-nCoV.

46 Phylogenetic analysis on the coronavirus genomes has revealed that 2019-nCoV is a  
47 new member of the betacoronavirus genus, which includes SARS-CoV, MERS-CoV, bat  
48 SARS-related coronaviruses (SARSr-CoV), as well as others identified in humans and diverse  
49 animal species<sup>1-3,7</sup>. Bat coronavirus RaTG13 appears to be the closest relative of the 2019-  
50 nCoV sharing over 93.1% homology in the spike (S) gene. SARS-CoV and other SARSr-CoVs  
51 however are rather distinct with less than 80% homology<sup>1</sup>.

52 Coronaviruses utilize the homotrimeric spike glycoprotein (S1 subunit and S2 subunit  
53 in each spike monomer) on the envelope to bind their cellular receptors. Such binding triggers  
54 a cascade events leading to the fusion between cell and viral membranes for cell entry. Our  
55 cryo-EM studies have shown that the binding of SARS-CoV spike to the cell receptor ACE2  
56 induces the dissociation of the S1 with ACE2, prompting the S2 to transition from a metastable  
57 prefusion to a more stable postfusion state that is essential for membrane fusion<sup>8,9</sup>. Therefore,  
58 binding to ACE2 receptor is a critical initial step for SARS-CoV to entry into the target cells.  
59 Recent studies also pointed to the important role of ACE2 in mediating entry of 2019-nCoV<sup>1,10</sup>.  
60 HeLa cells expressing ACE2 is susceptible to 2019-nCoV infection while those without failed  
61 to do so<sup>1</sup>. In vitro SPR experiments also showed that the binding affinity of ACE2 to the spike  
62 glycoprotein and to the receptor-binding domain (RBD) are equivalent, with the former of 14.7  
63 nM and the latter of 15.2 nM<sup>11,12</sup>. These results indicate that the RBD is the key functional  
64 component within the S1 subunit responsible for binding to ACE2.

65 The cryo-EM structure of the 2019-nCoV spike trimer at 3.5 Å resolution has just been  
66 reported<sup>12</sup>. The coordinates are not yet available for detailed characterization. However,  
67 inspection of the structure features presented in the uploaded manuscript on bioRxiv indicated

68 incomplete resolution of RBD in the model, particularly for the receptor-binding motif (RBM)  
69 that interacts directly with ACE2. Computer modeling of interaction between 2019-CoV RBD  
70 and ACE2 has identified some residues potentially involved in the actual interaction but the  
71 actual interaction remained elusive<sup>13</sup>. Furthermore, despite of impressive cross-reactive  
72 neutralizing activity from serum/plasma of SARS-CoV recovered patients<sup>14</sup>, no SARS-CoV  
73 monoclonal antibodies targeted to RBD so far isolated are able to bind and neutralize 2019-  
74 nCoV<sup>11,12</sup>. These findings highlight some intrinsic sequence and structure differences between  
75 the SARS-CoV and 2019-nCoV RBDs.

76 To elucidate the 2019-nCoV RBD and ACE2 interaction at a higher resolution, we  
77 chose to determine the complex structure of 2019-nCoV RBD bound with ACE2 by X-ray  
78 crystallography. The atomic-level structural information would greatly improve our  
79 understanding of interaction between 2019-nCoV and susceptible cells, providing precise  
80 target for neutralizing antibodies, and assisting structure-based vaccine design urgently needed  
81 in our ongoing combat against 2019-nCoV. Specifically, we expressed the 2019-nCoV RBD  
82 (residues Arg319-Phe541) (Fig. 1a and 1b) and the N-terminal peptidase domain of ACE2  
83 (residues Ser19-Asp615) in Hi5 insect cells and purified them by Ni-NTA affinity and gel-  
84 filtration (Fig. S1). The complex structure was determined by molecular replacement using the  
85 SARS-CoV RBD and ACE2 structures as search models, and refined at 2.45 Å resolution to  
86 final  $R_{\text{work}}$  and  $R_{\text{free}}$  factors of 21.9% and 27.8%, respectively (Fig. S2 and Table S1). The final  
87 model contains residues Cys336 to Glu516 of 2019-nCoV RBD and residues Ser19 to Asp615  
88 of ACE2 N-terminal peptidase domain, as well as 63 solvent molecules.

89 The 2019-nCoV RBD has a twisted four-stranded antiparallel  $\beta$  sheet ( $\beta 1$ ,  $\beta 2$ ,  $\beta 3$  and  
90  $\beta 6$ ) with short connecting helices and loops forming as the core (Fig. 1b and 1c). Between the  
91  $\beta 3$  and  $\beta 6$  strands in the core, there is an extended insertion containing short  $\beta 4$  and  $\beta 5$  strands,  
92  $\alpha 4$  and  $\alpha 5$  helices and loops (Fig. 1b and 1c). This extended insertion is the receptor-binding  
93 motif (RBM) containing most of the contacting residues of 2019-nCoV for ACE2 binding. A  
94 total of nine cysteine residues are found in the RBD, six of which forming three pairs of  
95 disulfide bonds are resolved in the final model. Among these three pairs, two are in the core  
96 (Cys336-Cys361 and Cys379-Cys432) to help stabilize the  $\beta$  sheet structure (Fig. 1c) while the  
97 remaining one (Cys480-Cys488) connects loops in the distal end of the RBM (Fig. 1c). The N-  
98 terminal peptidase domain of ACE2 has two lobes, forming the peptide substrate binding site  
99 between them. The extended RBM in the 2019-nCoV RBD contacts the bottom side of the  
100 ACE2 small lobe, with a concave outer surface in the RBM accommodating the N-terminal  
101 helix of the ACE2 (Fig. 1c). The overall structure of the 2019-nCoV RBD is similar to that of

102 the SARS-CoV RBD (Fig. 2a), with an r.m.s.d. of 1.2 Å for 174 aligned C $\alpha$  atoms. Even in the  
103 RBM that has more sequence variations, the overall structure is also highly similar (r.m.s.d. of  
104 1.3 Å) with only one obvious conformational change in the distal end (Fig. 2a). The overall  
105 binding model of the 2019-nCoV RBD to the ACE2 is also nearly identical to that observed in  
106 previously determined SARS-CoV RBD/ACE2 complex structure<sup>15</sup> (Fig. 2b).

107 The cradling of the ACE2 N-terminal helix by the RBM outer surface results in a large  
108 buried surface of  $\sim 1700$  Å<sup>2</sup> between the 2019-nCoV RBD and ACE2 receptor (Fig. 1c). With  
109 a distance cutoff of 4 Å, a total of 18 residues of the RBD contact 20 residues of the ACE2  
110 (Fig. 3a and Table S2). Analysis of interface between SARS-CoV RBD and ACE2 revealed a  
111 total of 16 residues of the SARS-CoV RBD contact 20 residues of the ACE2 (Fig. 3a and Table  
112 S2). Among the 20 residues interacting with the two different RBDs, 17 are shared and most  
113 of which are located at the N-terminal helix (Fig. 2a). One prominent and common feature  
114 presented at both interfaces is the networks of hydrophilic interactions. There are 17 hydrogen  
115 bonds and 1 salt bridge at the 2019-nCoV RBD/ACE2 interface, and 12 hydrogen bonds and 2  
116 salt bridges at the SARS-CoV RBD/ACE2 interface (Table 1). Another shared feature is the  
117 involvement of multiple tyrosine residues in forming hydrogen-bonding interactions with the  
118 polar hydroxyl group. These include Tyr449, Tyr489, Tyr495 and Tyr505 from the 2019-nCoV  
119 RBD and Tyr436, Tyr475 and Tyr491 from the SARS-CoV RBD (Table 1). To further identify  
120 and compare the ACE2-interacting residues, we used structure-guided sequence alignment and  
121 mapped them onto their respective RBD sequences (Fig. 3b). Among 14 shared amino acid  
122 positions utilized by both RBMs for ACE2 interaction, eight have the identical residues  
123 between the 2019-nCoV and SARS-CoV RBDs including Tyr449/Tyr436, Tyr453/Tyr440,  
124 Asn487/Asn473, Tyr489/Tyr475, Gly496/Gly482, Thr500/Thr486, Gly502/Gly488 and  
125 Tyr505/Tyr491 (Fig. 3b). Five positions have residues demonstrating similar biochemical  
126 properties despite of having different side chains including Leu455/Tyr442, Phe456/Leu443,  
127 486Phe/Leu472, Gln493/Asn479 and Asn501/Thr487 (Fig. 3b). Four of the five SARS-CoV  
128 residues such as Tyr442, Leu472, Asn479 and Thr487 have previously been shown to be  
129 critical for ACE2 binding<sup>13</sup>. The remaining one is at the Gln498/484Tyr position, while the  
130 SARS-CoV RBD Tyr484 is not involved in hydrogen-bonding interaction, the Gln498 of the  
131 2019-nCoV RBD forms hydrogen-bonding interaction with Gln42 of ACE2 (Table 1). Outside  
132 RBM, there is a unique ACE2-interacting residues Lys417 in the 2019-nCoV, forming a salt-  
133 bridge with ACE2 Asp30 (Fig. 3b). This position is replaced by a valine in the SARS-CoV  
134 RBD that fails to participate in ACE2 binding (Fig. 3b). Consistently, comparison of the  
135 surface electrostatic potential also identified a positive-charged patch on the 2019-nCoV RBD

136 contributed by Lys417 that is absent on the SARS-CoV RBD (Fig. 3c). Taken together, these  
137 results show that the 2019-nCoV RBD/ACE2 and SARS-CoV RBD/ACE2 interfaces share  
138 substantial similarity in the buried surface area, the number of interacting residues, and  
139 hydrophilic interaction networks although some differences in surface electrostatic potential  
140 were identified (Fig. 3). Such similarity argues strongly for the convergent evolution of the  
141 2019-nCoV and SARS-CoV RBD structures to improve binding affinity to the same ACE2  
142 receptor despite of being in different genetic lineages in the betacoronavirus genus.

143 Consistent with structural similarity, the binding affinities between ACE2 and 2019-  
144 nCoV and SARS-CoV RBDs also fall into the same range (~10-60 nM) as previously  
145 reported<sup>11,12</sup>. However, this is somewhat different from a recent report where an ~10-20 fold  
146 increased binding between ACE2 and 2019-nCoV spike trimer was found ( $K_D$  of 14.7 nM)  
147 compared with that between ACE2 and SARS-CoV RBD-SD1 ( $K_D$  of 325 nM)<sup>12</sup>. This is  
148 perhaps due to the different proteins used in the assay or some other unknown reasons.  
149 Nevertheless, the binding affinity alone is unlikely to explain the unusual transmissibility of  
150 2019-nCoV. Other factors such as the unique “RRAR” furin cleavage site at the S1/S2  
151 boundary of the 2019-nCoV spike may play more important roles in facilitating the rapid  
152 human-to-human transmission.

153 Neutralizing antibodies represent a critical component of immune system in fighting  
154 against viral infection. It has been reported that the 2019-nCoV could be cross-neutralized by  
155 horse anti-SARS-CoV serum and convalescent serum from SARS-infected patient<sup>1,14</sup>,  
156 reinforcing structural similarity between 2019-nCoV and SARS-CoV RBDs. Such similarity  
157 also raised the hope of rapid application of previously characterized SARS-CoV monoclonal  
158 antibodies in the clinical setting. However, no antibody targeted to SARS-CoV (m396, S230,  
159 80R and CR3014) has so far demonstrated any impressive cross-binding and neutralization  
160 activity against 2019-nCoV spike or RBD<sup>11,12,16-19</sup>. One exception is SARS-CoV antibody  
161 CR3022 that binds to the 2019-nCoV RBD with a  $K_D$  of 6.2 nM, although its neutralizing  
162 activity against 2019-nCoV has not been reported yet<sup>11</sup>. Currently, we are uncertain where  
163 exactly the epitope of CR3022 on SARS-CoV nor on 2019-nCoV RBDs. Among the three  
164 antibodies incapable of binding to the 2019-nCoV RBD, two (m396 and 80R) have the epitopes  
165 resolved by high resolution crystal structure determination of SARS-CoV RBD-Fab complexes.  
166 Through mapping these epitope residues onto the sequence of SARS-CoV RBD aligned with  
167 the sequence of 2019-nCoV RBD (Fig. 4), we found that antibody m396 has seven residue  
168 changes in the 2019-nCoV RBD among 21 epitope positions (Fig. 4). There are 15 residue  
169 changes in the 2019-nCoV RBD among 24 epitope positions by antibody 80R (Fig. 4). This

170 may provide the structural basis for the lack of cross-reactivity by m396 and 80R. However,  
171 conserved residues between 2019-nCoV and SARS-nCoV RBD indeed exist, even in the more  
172 variable RBM (Fig. 4). The cross-neutralization of 2019-nCoV by horse anti-SARS-CoV  
173 serum and serum/plasm from recovered SARS patients indicates a great potential in identifying  
174 antibodies with cross-reactivity between these two coronaviruses<sup>1,14</sup>. Such antibody will  
175 present a great promise for developing therapeutic agents toward diverse coronavirus species  
176 including 2019-nCoV.  
177



## 178 **Materials and Methods**

### 179 *Protein expression and purification*

180 The 2019-nCoV receptor-binding domain (RBD) and the N-terminal peptidase domain of  
181 human ACE2 were expressed using the Bac-to-Bac baculovirus system (Invitrogen). The 2019-  
182 nCoV RBD (residues Arg319-Phe541) with an N-terminal gp67 signal peptide for secretion  
183 and a C-terminal 6×His tag for purification was inserted into pFastBac-Dual vector (Invitrogen).  
184 The construct was transformed into bacterial DH10Bac component cells, and the extracted  
185 bacmid was then transfected into Sf9 cells using Cellfectin II Reagent (Invitrogen). The low-  
186 titer viruses were harvested and then amplified to generate high-titer virus stock, which was  
187 used to infect Hi5 cells at a density of  $2 \times 10^6$  cells/ml. The supernatant of cell culture containing  
188 the secreted RBD was harvested 60 h after infection, concentrated and buffer-exchanged to  
189 HBS (10 mM HEPES, pH 7.2, 150 mM NaCl). RBD was captured by Ni-NTA resin (GE  
190 Healthcare) and eluted with 500 mM imidazole in HBS buffer. RBD was then purified by gel  
191 filtration chromatography using the Superdex 200 column (GE Healthcare) pre-equilibrated  
192 with HBS buffer. Fractions containing RBD were collected.

193 The N-terminal peptidase domain of human ACE2 (residues Ser19-Asp615) was  
194 expressed and purified by essentially the same protocol used for the 2019-nCoV RBD. To  
195 purify the 2019-nCoV RBD/ACE2 complex, ACE2 was incubated with RBD for 1 h on ice in  
196 HBS buffer, and the mixture was then subjected to gel filtration chromatography. Fractions  
197 containing the complex were pooled and concentrated to 13 mg/ml.

### 198 *Crystallization and data collection*

199 Crystals were successfully grown at room temperature in sitting drops, over wells containing  
200 100 mM MES, pH 6.5, 10% PEG5000mme, 12% 1-propanol. The drops were made by mixing  
201 200 nL RBD/ACE2 in 20 mM Tris pH 7.5, 150 mM NaCl with 200 nL well solution. Crystals  
202 were harvested, soaked briefly in 100 mM MES, pH 6.5, 10% PEG5000mme, 12% 1-propanol,  
203 20% glycerol, and flash-frozen in liquid nitrogen. Diffraction data were collected at the BL17U  
204 beam line of the Shanghai Synchrotron Research Facility (SSRF)<sup>20</sup>. Diffraction data were auto-  
205 processed with aquarium pipeline and the data processing statistics are listed in Table S1<sup>21</sup>.

### 206 *Structural determination and refinement*

207 The structure was determined by the molecular replacement method with PHASER in CCP4  
208 suite<sup>22</sup>. The search models are ACE2 extracellular domain and SARS-CoV RBD (PDB code  
209 2AJF). Density map improvement by atoms update and refinement was performed with  
210 ARP/wARP<sup>23</sup>. Subsequent model building and refinement were performed using COOT and



211 PHENIX, respectively<sup>24,25</sup>. The structural refinement statistics are listed in Table S1. All  
212 structural figures were generated with PyMol<sup>26</sup>.

213

#### 214 **Acknowledgments**

215 We thank the SSRF BL17U beam line for data collection and processing. We thank at the X-  
216 ray crystallography platform of the Tsinghua University Technology Center for Protein  
217 Research for providing the facility support. This work was supported by funds from Beijing  
218 Advanced Innovation Center for Structural Biology at Tsinghua University and the National  
219 Key Plan for Scientific Research and Development of China (grant number 2016YFD0500307).  
220 It is also supported by Tsinghua University Initiative Scientific Research Program  
221 (20201080053), the National Natural Science Foundation Award (81530065), Beijing  
222 Municipal Science and Technology Commission (171100000517-001 and -003), and Tencent  
223 Foundation, Shuidi Foundation, and TH Capital.

224

## 225 References

- 226 1 Zhou, P. *et al.* A pneumonia outbreak associated with a new coronavirus of probable  
227 bat origin. *Nature*, doi:10.1038/s41586-020-2012-7 (2020).
- 228 2 Wu, F. *et al.* A new coronavirus associated with human respiratory disease in China.  
229 *Nature*, doi:10.1038/s41586-020-2008-3 (2020).
- 230 3 Zhu, N. *et al.* A Novel Coronavirus from Patients with Pneumonia in China, 2019. *N*  
231 *Engl J Med*, doi:10.1056/NEJMoa2001017 (2020).
- 232 4 Huang, C. *et al.* Clinical features of patients infected with 2019 novel coronavirus in  
233 Wuhan, China. *Lancet* **395**, 497-506, doi:10.1016/S0140-6736(20)30183-5 (2020).
- 234 5 Kui, L. *et al.* Clinical characteristics of novel coronavirus cases in tertiary hospitals in  
235 Hubei Province. *Chin Med J (Engl)*, doi:10.1097/CM9.0000000000000744 (2020).
- 236 6 Wang, D. *et al.* Clinical Characteristics of 138 Hospitalized Patients With 2019 Novel  
237 Coronavirus-Infected Pneumonia in Wuhan, China. *JAMA*,  
238 doi:10.1001/jama.2020.1585 (2020).
- 239 7 Lu, R. *et al.* Genomic characterisation and epidemiology of 2019 novel coronavirus:  
240 implications for virus origins and receptor binding. *Lancet*, doi:10.1016/S0140-  
241 6736(20)30251-8 (2020).
- 242 8 Gui, M. *et al.* Cryo-electron microscopy structures of the SARS-CoV spike  
243 glycoprotein reveal a prerequisite conformational state for receptor binding. *Cell Res.*  
244 **27**, 119-129, doi:10.1038/cr.2016.152 (2017).
- 245 9 Song, W., Gui, M., Wang, X. & Xiang, Y. Cryo-EM structure of the SARS  
246 coronavirus spike glycoprotein in complex with its host cell receptor ACE2. *PLoS*  
247 *Pathog* **14**, e1007236, doi:10.1371/journal.ppat.1007236 (2018).
- 248 10 Letko, M. & Munster, V. Functional assessment of cell entry and receptor usage for  
249 lineage B  $\beta$ -coronaviruses, including 2019-nCoV. *bioRxiv*, 2020.2001.2022.915660,  
250 doi:10.1101/2020.01.22.915660 (2020).
- 251 11 Tian, X. *et al.* Potent binding of 2019 novel coronavirus spike protein by a SARS  
252 coronavirus-specific human monoclonal antibody. *Emerg Microbes Infect* **9**, 382-385,  
253 doi:10.1080/22221751.2020.1729069 (2020).
- 254 12 Wrapp, D. *et al.* Cryo-EM Structure of the 2019-nCoV Spike in the Prefusion  
255 Conformation. *bioRxiv*, 2020.2002.2011.944462, doi:10.1101/2020.02.11.944462  
256 (2020).
- 257 13 Wan, Y., Shang, J., Graham, R., Baric, R. S. & Li, F. Receptor recognition by novel  
258 coronavirus from Wuhan: An analysis based on decade-long structural studies of  
259 SARS. *J. Virol.*, doi:10.1128/JVI.00127-20 (2020).
- 260 14 Hoffmann, M. *et al.* The novel coronavirus 2019 (2019-nCoV) uses the SARS-  
261 coronavirus receptor ACE2 and the cellular protease TMPRSS2 for entry into target  
262 cells. *bioRxiv*, 2020.2001.2031.929042, doi:10.1101/2020.01.31.929042 (2020).
- 263 15 Li, F., Li, W., Farzan, M. & Harrison, S. C. Structure of SARS coronavirus spike  
264 receptor-binding domain complexed with receptor. *Science* **309**, 1864-1868,  
265 doi:10.1126/science.1116480 (2005).
- 266 16 Prabakaran, P. *et al.* Structure of severe acute respiratory syndrome coronavirus  
267 receptor-binding domain complexed with neutralizing antibody. *J. Biol. Chem.* **281**,  
268 15829-15836, doi:10.1074/jbc.M600697200 (2006).
- 269 17 Hwang, W. C. *et al.* Structural basis of neutralization by a human anti-severe acute  
270 respiratory syndrome spike protein antibody, 80R. *J. Biol. Chem.* **281**, 34610-34616,  
271 doi:10.1074/jbc.M603275200 (2006).
- 272 18 Walls, A. C. *et al.* Unexpected Receptor Functional Mimicry Elucidates Activation of  
273 Coronavirus Fusion. *Cell* **176**, 1026-1039 e1015, doi:10.1016/j.cell.2018.12.028  
274 (2019).

- 275 19 van den Brink, E. N. *et al.* Molecular and biological characterization of human  
276 monoclonal antibodies binding to the spike and nucleocapsid proteins of severe acute  
277 respiratory syndrome coronavirus. *J. Virol.* **79**, 1635-1644,  
278 doi:10.1128/JVI.79.3.1635-1644.2005 (2005).
- 279 20 Otwinowski, Z. & Minor, W. Processing of X-ray diffraction data collected in  
280 oscillation mode. *Methods Enzymol.* **276**, 307-326 (1997).
- 281 21 Yu, F. *et al.* Aquarium: an automatic data-processing and experiment information  
282 management system for biological macromolecular crystallography beamlines.  
283 *Journal of Applied Crystallography* **52**, 472-477, doi:10.1107/s1600576719001183  
284 (2019).
- 285 22 McCoy, A. J. *et al.* Phaser crystallographic software. *J Appl Crystallogr* **40**, 658-674,  
286 doi:10.1107/S0021889807021206 (2007).
- 287 23 Cohen, S. X. *et al.* ARP/wARP and molecular replacement: the next generation. *Acta*  
288 *Crystallogr D Biol Crystallogr* **64**, 49-60, doi:10.1107/S0907444907047580 (2008).
- 289 24 Emsley, P. & Cowtan, K. Coot: model-building tools for molecular graphics. *Acta*  
290 *Crystallogr D Biol Crystallogr* **60**, 2126-2132, doi:10.1107/S0907444904019158  
291 (2004).
- 292 25 Adams, P. D. *et al.* PHENIX: building new software for automated crystallographic  
293 structure determination. *Acta Crystallogr D Biol Crystallogr* **58**, 1948-1954,  
294 doi:10.1107/s0907444902016657 (2002).
- 295 26 Janson, G., Zhang, C., Prado, M. G. & Paiardini, A. PyMod 2.0: improvements in  
296 protein sequence-structure analysis and homology modeling within PyMOL.  
297 *Bioinformatics* **33**, 444-446, doi:10.1093/bioinformatics/btw638 (2017).  
298

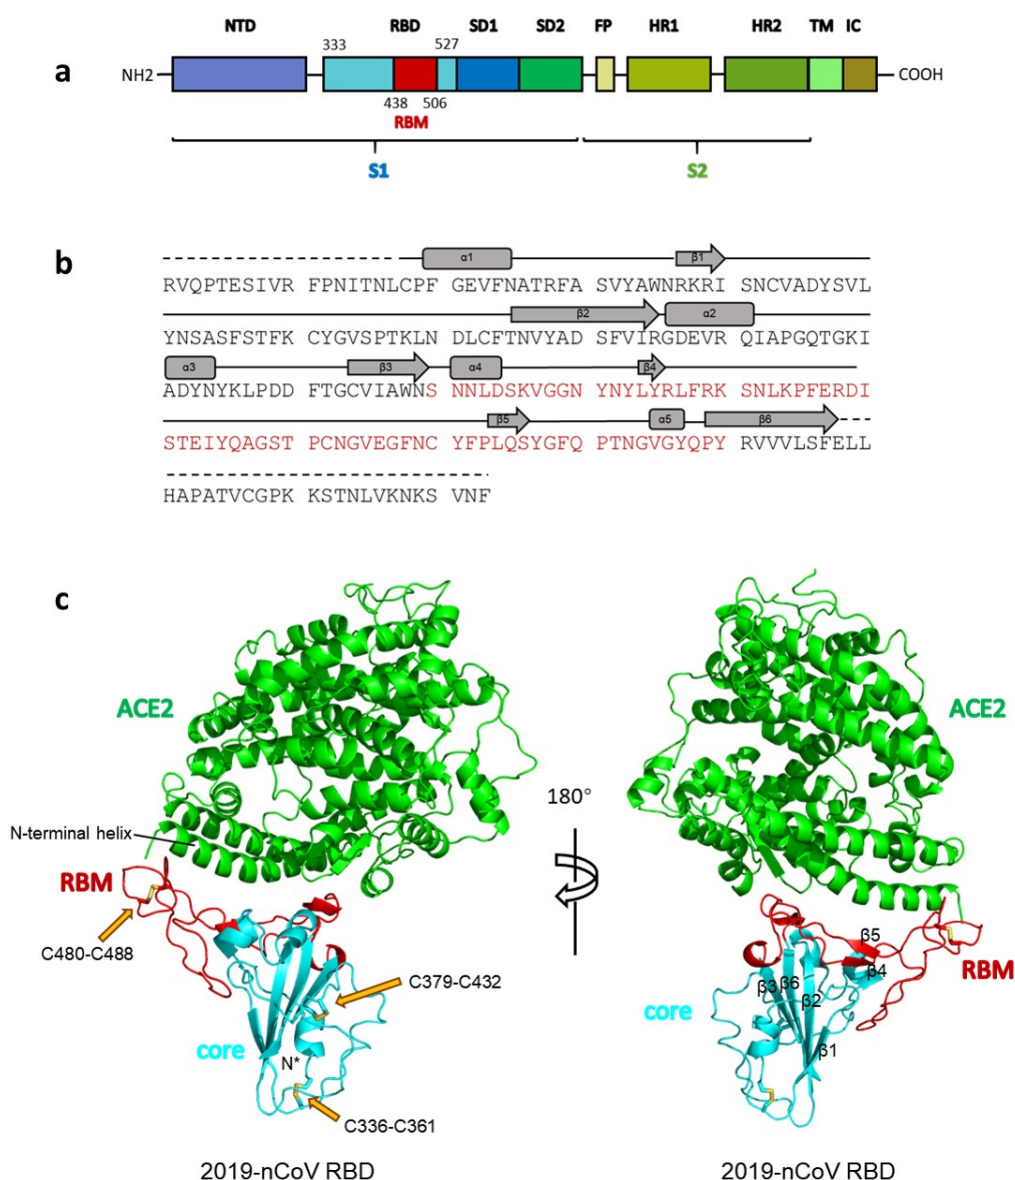

299  
 300 **Fig. 1 Overall structure of 2019-nCoV RBD bound with ACE2.** (a) Overall topology of  
 301 2019-nCoV spike monomer. NTD, N-terminal domain. RBD, receptor-binding domain. RBM,  
 302 receptor-binding motif. SD1, subdomain 1. SD2, subdomain 2. FP, fusion peptide. HR1, heptad  
 303 repeat 1. HR2, heptad repeat 2. TM, transmembrane region. IC, intracellular domain. (b)  
 304 Sequence and secondary structures of 2019-nCoV RBD. The RBM is colored red. (c) Overall  
 305 structure of 2019-nCoV RBD bound with ACE2. ACE2 is colored green. 2019-nCoV RBD  
 306 core is colored cyan and RBM is colored red. Disulfide bonds in the 2019-nCoV RBD are  
 307 shown as stick and indicated by yellow arrows. The N-terminal helix of ACE2 responsible for  
 308 binding is labeled.  
 309

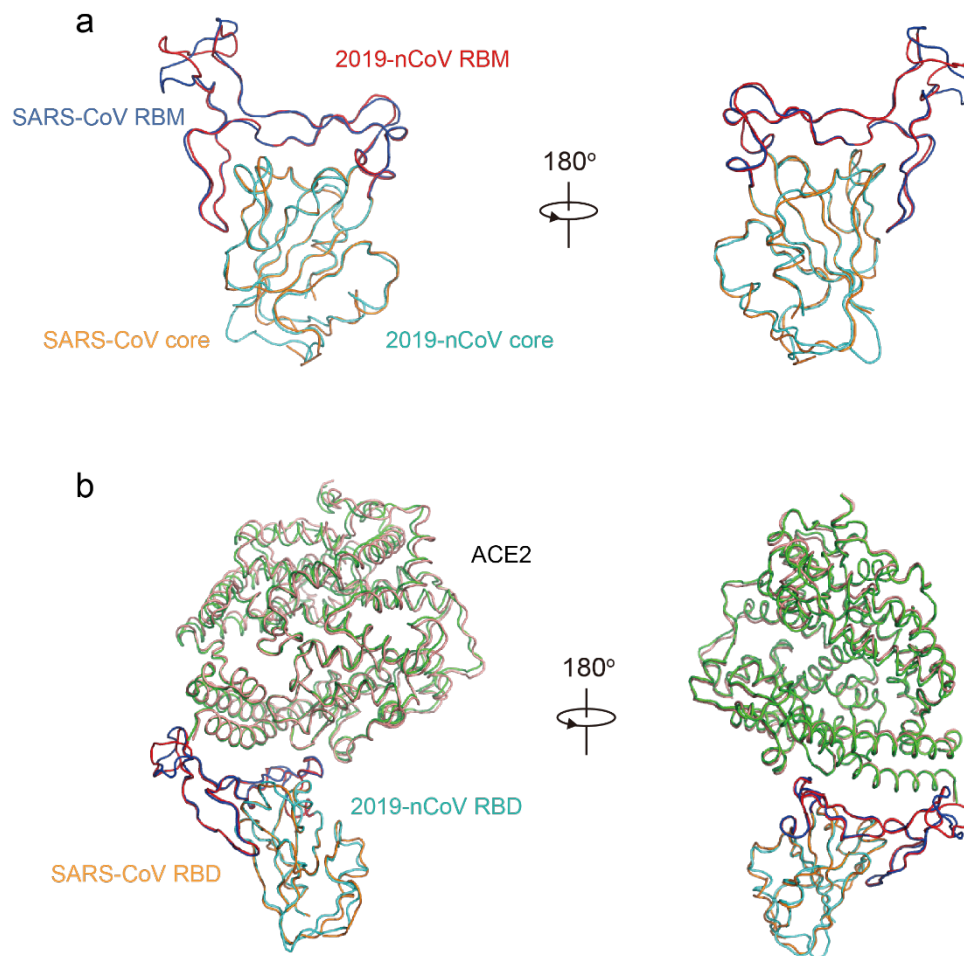

310  
311  
312  
313  
314  
315  
316  
317  
318

**Fig. 2 Structural comparisons of 2019-nCoV and SARS-CoV RBDs and their binding modes to ACE2 receptor. (a)** Alignment of the 2019-nCoV RBD (core in cyan and RBM in red) and SARS-CoV RBD (core in orange and RBM in blue) structures. **(b)** Structural alignment of 2019-nCoV RBD/ACE2 and SARS-CoV RBD/ACE2 complexes. 2019-nCoV RBD is colored cyan and red, its interacting ACE2 is colored green. SARS-CoV RBD is colored orange and blue, its interacting ACE2 is colored salmon. The PDB code for SARS-CoV RBD/ACE2 complex: 2AJF.



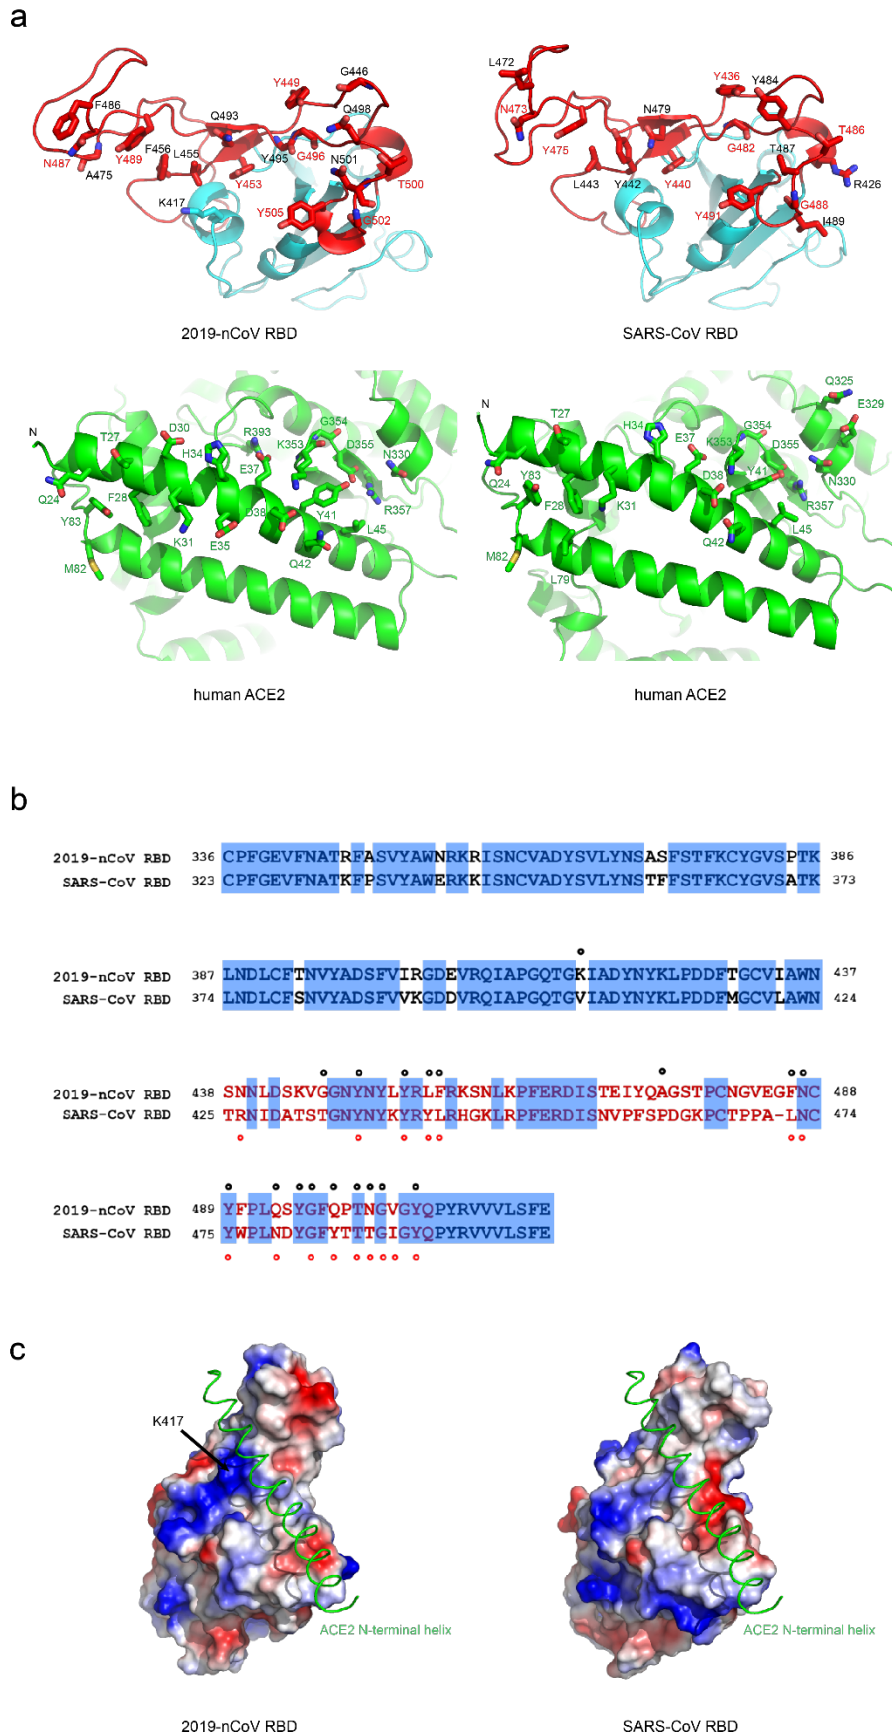

320 **Fig. 3 The 2019-nCoV RBD/ACE2 binding interface compared with that of SARS-CoV**  
321 **RBD/ACE2. (a)** Contacting residues shown as stick at the 2019-nCoV RBD/ACE2 and SARS-  
322 CoV RBD/ACE2 interfaces. Positions in both RBDs involved in ACE2 binding are indicated  
323 by red labels. **(b)** Sequence alignment of 2019-nCoV RBD and SARS-CoV RBD. Contacting  
324 residues in the 2019-nCoV RBD are indicated by black dots; contacting residues in the SARS-  
325 CoV RBD are indicated by red dots. **(c)** Electrostatic potential map of 2019-nCoV RBD (left  
326 panel), and SARS-CoV RBD (right panel). The position of K417 in the 2019-nCoV RBD is  
327 indicated by black arrow. The N-terminal helix of ACE2 is shown as green ribbon. The PDB  
328 code for SARS-CoV RBD/ACE2 complex: 2AJF.  
329



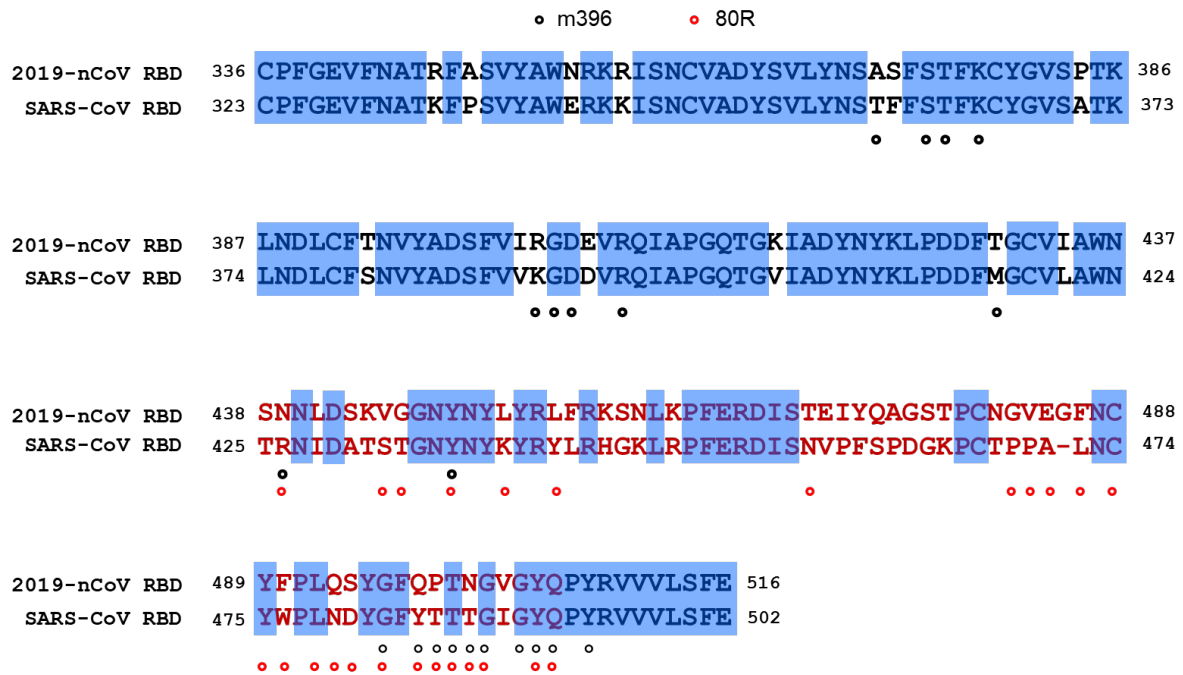

330  
331  
332  
333  
334  
335

**Fig. 4 Mapping of SARS-CoV neutralizing antibody epitopes.** The epitopes of SARS-CoV neutralizing antibodies m396 and 80R, which target the RBD, are labeled in the SARS-CoV sequence aligned with the sequence of 2019-nCoV RBD. Epitope residues of m396 are indicated by black dots; epitope residues of 80R are indicated by red dots.

336 **Table 1.** The hydrogen bonds and salt bridges identified using PISA program at the 2019-  
 337 nCoV RBD/ACE2 and SARS-CoV RBD/ACE2 interfaces.  
 338

|                   | 2019-nCoV RBD   | Distance(Å) | ACE2      | Distance(Å) | SARS-CoV RBD    |
|-------------------|-----------------|-------------|-----------|-------------|-----------------|
| Hydrogen<br>bonds | N487(ND2)       | 2.4         | Q24(OE1)  | 2.9         | N473(ND2)       |
|                   | Q493(NE2)       | 3.2         | E35(OE1)  |             |                 |
|                   | <b>Y505(OH)</b> | 3.5         | E37(OE1)  | 3.4         | <b>Y491(OH)</b> |
|                   | <b>Y505(OH)</b> | 3.6         | E37(OE2)  |             |                 |
|                   | <b>Y449(OH)</b> | 3.0         | D38(OD1)  | 3.0         | <b>Y436(OH)</b> |
|                   | <b>Y449(OH)</b> | 2.8         | D38(OD2)  | 3.0         | <b>Y436(OH)</b> |
|                   | T500(OG1)       | 2.7         | Y41(OH)   | 2.8         | T486(OG1)       |
|                   | N501(N)         | 3.7         | Y41(OH)   | 3.3         | T487(N)         |
|                   | Q498(OE1)       | 3.1         | Q42(NE2)  |             |                 |
|                   | G446(O)         | 3.6         | Q42(NE2)  |             |                 |
|                   | <b>Y449(OH)</b> | 3.2         | Q42(NE2)  |             |                 |
|                   |                 |             | Q42(OE1)  | 2.7         | <b>Y436(OH)</b> |
|                   | N487(OD1)       | 2.5         | Y83(OH)   | 2.8         | N473(ND2)       |
|                   | <b>Y489(OH)</b> | 3.4         | Y83(OH)   | 3.3         | <b>Y475(OH)</b> |
|                   |                 |             | Q325(OE1) | 3.8         | R426(NH2)       |
|                   |                 |             | N330(ND2) | 2.8         | T486(O)         |
|                   | <b>Y495(O)</b>  | 3.5         | K353(NZ)  |             |                 |
|                   | G496(O)         | 3.1         | K353(NZ)  |             |                 |
|                   | G502(N)         | 2.7         | K353(O)   | 2.5         | G488(N)         |
|                   | <b>Y505(OH)</b> | 3.8         | R393(NH2) |             |                 |
| Salt<br>bridges   | K417(NZ)        | 3.1         | D30(OD2)  |             |                 |
|                   |                 |             | E329(OE2) | 3.7         | R426(NH1)       |
|                   |                 |             | E329(OE2) | 2.9         | R426(NH2)       |

339

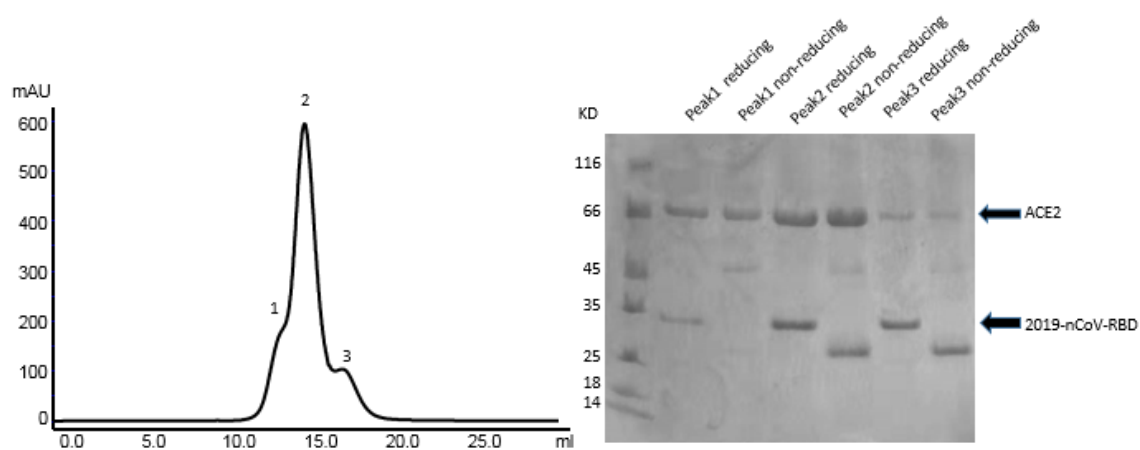

340  
341  
342  
343  
344  
345  
346

**Fig. S1 Purification of 2019-nCoV RBD/ACE2 complex**

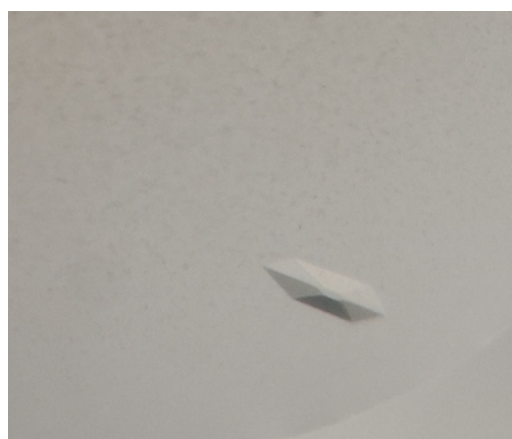

347  
348  
349  
350

**Fig. S2 Crystal of 2019-nCoV RBD/ACE2 complex.**

351 **Table S1 Data collection and refinement statistics.**  
 352

| <b>Data Collection</b>                                         |                                  |
|----------------------------------------------------------------|----------------------------------|
| Beamline                                                       | SSRF BL17U                       |
| Wavelength                                                     | 0.9796 Å                         |
| Space group                                                    | P4 <sub>1</sub> 2 <sub>1</sub> 2 |
| Cell dimensions                                                |                                  |
| a, b, c (Å)                                                    | 104.67, 104.67, 228.72           |
| α, β, γ (°)                                                    | 90, 90, 90                       |
| Resolution (Å)                                                 | 53.1- 2.45 (2.54 - 2.45)         |
| <sup>a</sup> R <sub>merge</sub>                                | 0.118 (2.70)                     |
| <sup>b</sup> R <sub>pim</sub>                                  | 0.033 (0.738)                    |
| <sup>c</sup> CC <sub>1/2</sub> of the highest resolution shell | 0.661                            |
| I / σI                                                         | 24.2 (1.7)                       |
| Completeness (%)                                               | 99.90 (99.98)                    |
| Redundancy                                                     | 26.1 (27.3)                      |
| <b>Refinement</b>                                              |                                  |
| Resolution (Å)                                                 | 53.1- 2.45                       |
| No. Reflections                                                | 47545                            |
| <sup>d</sup> R <sub>work</sub> / R <sub>free</sub> (%)         | 21.1/23.7                        |
| No. atoms                                                      |                                  |
| Protein                                                        | 6369                             |
| Water                                                          | 16                               |
| B-factors (Å <sup>2</sup> )                                    |                                  |
| Protein                                                        | 68.2                             |
| Water                                                          | 58.8                             |
| r.m.s. deviations                                              |                                  |
| Bond lengths (Å)                                               | 0.014                            |
| Bond angles (°)                                                | 1.90                             |
| Ramachandran plot (%)                                          |                                  |
| Most favored                                                   | 95.01                            |
| Allowed                                                        | 4.61                             |
| Disallowed                                                     | 0.38                             |

353 <sup>a</sup>R<sub>merge</sub> =  $\sum_{hkl} \sum_j |I_j(hkl) - \langle I(hkl) \rangle| / \sum_{hkl} \sum_j I_j(hkl)$ , where *I* is the intensity of reflection.

354 <sup>b</sup>R<sub>pim</sub> =  $\sum_{hkl} [I/(N-I)]^{1/2} \sum_j |I_j(hkl) - \langle I(hkl) \rangle| / \sum_{hkl} \sum_j I_j(hkl)$ , where *N* is the redundancy of the  
 355 dataset.

356 <sup>c</sup>CC<sub>1/2</sub> is the correlation coefficient of the half datasets.

357 <sup>d</sup>R<sub>work</sub> =  $\sum_{hkl} | |F_{obs}| - |F_{calc}| | / \sum_{hkl} |F_{obs}|$ , where *F<sub>obs</sub>* and *F<sub>calc</sub>* is the observed and the  
 358 calculated structure factor, respectively. *R<sub>free</sub>* is the cross-validation *R* factor for the test set of  
 359 reflections (5% of the total) omitted in model refinement.

360

361 **Table S2 Contact residues at the 2019-nCoV RBD/ACE2 and SARS-CoV RBD-ACE2**  
362 **interfaces**

363

| <b>2019-nCoV RBD-ACE2 interface</b> |               | <b>SARS-CoV-ACE2 interface</b> |              |
|-------------------------------------|---------------|--------------------------------|--------------|
| ACE2                                | 2019-nCoV RBD | ACE2                           | SARS-CoV RBD |
| 24Q                                 | 417K          | 24Q                            | 426R         |
| 27T                                 | 446G          | 27T                            | 436Y         |
| 28F                                 | 449Y          | 28F                            | 440Y         |
| 30D                                 | 453Y          | 31K                            | 442Y         |
| 31K                                 | 455L          | 34H                            | 443L         |
| 34H                                 | 456F          | 37E                            | 472L         |
| 35E                                 | 475A          | 38D                            | 473N         |
| 37E                                 | 486F          | 41Y                            | 475Y         |
| 38D                                 | 487N          | 42Q                            | 479N         |
| 41Y                                 | 489Y          | 45L                            | 482G         |
| 42Q                                 | 493Q          | 79L                            | 484Y         |
| 45L                                 | 495Y          | 82M                            | 486T         |
| 82M                                 | 496G          | 83Y                            | 487T         |
| 83Y                                 | 498Q          | 325Q                           | 488G         |
| 330N                                | 500T          | 329E                           | 489I         |
| 353K                                | 501N          | 330N                           | 491Y         |
| 354G                                | 502G          | 353K                           |              |
| 355D                                | 505Y          | 354G                           |              |
| 357R                                |               | 355D                           |              |
| 393R                                |               | 357R                           |              |

364
